# Supplementary material for: Mutations in SACPD-C Result in a Range of Elevated Stearic Acid Concentration in Soybean Seed
Source: PubMed Central journal article supplement (PMC4028252; doi:10.1371/journal.pone.0097891), 2014-05-20
Supplement: pone.0097891.s002.pdf [file pone.0097891.s002.pdf]

## Supplemental Table 1. Sequencing and genotyping primers

### Genotyping primers

| Name  | Sequence                         | Purpose            | Mutation           | enzyme (for dCAPS marker) |
|-------|----------------------------------|--------------------|--------------------|---------------------------|
| kk505 | TGTATTTTGTGTTTATTAAATTGGGTA      | genotyping         | 14197/SACPDC_Y211C |                           |
| kk532 | CCACGATTCTTGAGTACGCGTTC          | genotyping (dCAPS) | 14197/SACPDC_Y211C | RsaI                      |
| kk508 | CCTGGTTTCACGTGACATGG             | genotyping         | 18948/SACPDC_H223R |                           |
| kk559 | CCTTCGCGAGCCGAGCCGTCACCCC        | genotyping (dCAPS) | 18948/SACPDC_H223R | DraIII                    |
| kk689 | GCCGAGCCGTGTTCCCGTGCGCCGCAAATGTT | genotyping (dCAPS) | 18190/SACPDC_A218E | BstAP I                   |
| kk690 | TGGCAATCGGAGCTTTCTCATAG          | genotyping         | 18190/SACPDC_A218E |                           |

### Sequencing primers

| Name  | Sequence                          | Location          | Purpose           |
|-------|-----------------------------------|-------------------|-------------------|
| kk655 | ACGTACAAAACCACAGCAC               | SACPD-C UTR+exon1 | amplify +sequence |
| kk656 | GGGAGGAAGTTTTGTGGCTG              | SACPD-C UTR+exon2 | amplify +sequence |
| kk497 | TCAAACCATGCAGATACGAAC             | SACPD-C exon 2    | amplify +sequence |
| kk504 | TTTTGCTTCATGTGGAATGG              | SACPD-C exon 2    | amplify +sequence |
| kk690 | TGGCAATCGGAGCTTTCTCATAG           | SACPD-C exon3     | amplify +sequence |
| kk509 | CAACAACCATGGATCCAACA              | SACPD-C exon4     | amplify +sequence |
| kk649 | CCTTCTTCTTCTGCCTTACATC            | SACPD-A exon 1    | amplify+sequence  |
| kk650 | TTAGACACTCAACCACAC                | SACPD-A exon 1    | amplify+sequence  |
| kk493 | TGTTGTACATGTGGGGGCTA              | SACPD-A exon 2/3  | amplify           |
| kk640 | GCGTATACAAATATATGAACATAGTAACAAACC | SACPD-A exon 2/3  | amplify           |
| kk494 | ACTACCATTGCGGAAGACCA              | SACPD-A exon 2/3  | sequence only     |
| kk639 | GCTGCTGCTTTTGTCACTTTTTG           | SACPD-A exon 2/3  | sequence only     |
| kk645 | CAAAGTGAATTTCAACTATTC             | SACPD-A exon 2/3  | sequence only     |
| kk641 | AAAGGGGAGAGTGGTTTGTGAAG           | SACPD-B exon 1    | amplify+sequence  |
| kk642 | CTCCTTCTACATTACTCTCTTCTCC         | SACPD-B exon 1    | amplify+sequence  |
| kk636 | GATGCCATGCAAATTCATGTTT            | SACPD-B exon 2/3  | amplify           |
| kk637 | CCCAGCAAGATTACATGTAATCAGTTGAC     | SACPD-B exon 2/3  | amplify           |
| kk638 | TGCTGCACTTATCACATTTCTG            | SACPD-B exon 2/3  | sequence only     |
| kk645 | CAAAGTGAATTTCAACTATTC             | SACPD-B exon 2/3  | sequence only     |
| kk646 | AAAAGTACAATAGCAGAAGACC            | SACPD-B exon 2/3  | sequence only     |
