# Supplementary material for: Mutations in SACPD-C Result in a Range of Elevated Stearic Acid Concentration in Soybean Seed
Source: PubMed Central journal article supplement (PMC4028252; doi:10.1371/journal.pone.0097891), 2014-05-20
Supplement: pone.0097891.s003.pdf [file pone.0097891.s003.pdf]

**Supplemental Table 2. M3 and M4 phenotypes and genotypes**

|                            | % palmitic acid | % stearic acid | % oleic acid | % linoleic acid | % linolenic acid | Genotype     |
|----------------------------|-----------------|----------------|--------------|-----------------|------------------|--------------|
| 14197 M3                   | 8.8             | 15.0           | 18.2         | 49.7            | 8.2              | ND           |
| 14197 M4 lines, field 2010 |                 |                |              |                 |                  |              |
| 14197.1                    | 10.5            | 9.5            | 20.3         | 52.0            | 7.6              | ND           |
| 14197.3                    | 10.1            | 8.5            | 20.3         | 53.2            | 8.0              | MUTANT       |
| 14197.4                    | 11.0            | 4.6            | 24.2         | 53.2            | 7.0              | WT           |
| 14197.5                    | 10.7            | 4.3            | 24.8         | 53.1            | 7.1              | WT           |
| 14197.6                    | 11.2            | 3.9            | 25.3         | 52.8            | 6.8              | WT           |
| 14197.7                    | 9.8             | 9.2            | 25.4         | 48.5            | 7.1              | HETEROZYGOTE |
| 14197.8                    | 11.4            | 4.2            | 24.7         | 52.5            | 7.2              | WT           |
| 14197.9                    | 10.4            | 5.8            | 25.3         | 51.8            | 6.8              | ND           |
| 14197.10                   | 11.3            | 4.1            | 22.9         | 54.2            | 7.5              | WT           |
| 14197.11                   | 9.1             | 14.6           | 17.4         | 50.9            | 8.1              | ND           |
| 14197.12                   | 11.0            | 4.4            | 29.9         | 48.7            | 6.0              | WT           |
| 14197.13                   | 10.4            | 4.3            | 23.8         | 54.1            | 7.5              | ND           |
| 14197.14                   | 12.1            | 4.0            | 19.9         | 55.7            | 8.3              | ND           |
| 14197.15                   | 10.1            | 9.3            | 20.0         | 52.1            | 8.7              | ND           |
| 14197.16                   | 10.5            | 5.3            | 25.5         | 51.9            | 6.8              | HETEROZYGOTE |
| 14197.17                   | 9.8             | 4.1            | 27.0         | 51.9            | 7.3              | WT           |
| 14197.18                   | 10.0            | 7.9            | 21.9         | 52.6            | 7.6              | HETEROZYGOTE |
| 14197.19                   | 9.9             | 8.9            | 21.1         | 52.1            | 8.0              | HETEROZYGOTE |
| 14197.20                   | 10.7            | 3.8            | 25.1         | 53.4            | 7.0              | WT           |
| 14197.22                   | 9.8             | 4.6            | 28.9         | 50.1            | 6.6              | WT           |
| (by genotyping assay)      |                 |                |              |                 |                  |              |
| 18948 M3                   | 10.9            | 10.1           | 19.2         | 51.7            | 8.1              | ND           |
| 18948 M4 lines, field 2009 |                 |                |              |                 |                  |              |
| 18948.1                    | 11.2            | 3.4            | 20.3         | 56.6            | 8.6              |              |
| 18948.2                    | 10.1            | 8.4            | 16.8         | 56.1            | 8.6              |              |
| 18948.3                    | 10.6            | 9.0            | 17.3         | 55.2            | 7.9              |              |
| 18948.4                    | 10.4            | 3.5            | 21.9         | 56.4            | 7.7              |              |
| 18948.5                    | 10.4            | 3.3            | 21.6         | 56.5            | 8.3              |              |
| 18948.6                    | 10.5            | 7.5            | 17.5         | 56.6            | 8.1              |              |
| (presumed segregating)     |                 |                |              |                 |                  |              |

|          |      |      |      |      |     |
|----------|------|------|------|------|-----|
| 18948.7  | 11.2 | 6.7  | 19.2 | 55.9 | 7.1 |
| 18948.8  | 10.0 | 3.9  | 22.0 | 56.2 | 8.0 |
| 18948.9  | 10.1 | 8.8  | 17.2 | 55.6 | 8.4 |
| 18948.10 | 10.4 | 3.4  | 20.8 | 57.7 | 7.8 |
| 18948.11 | 10.3 | 9.3  | 17.1 | 55.1 | 8.2 |
| 18948.12 | 10.5 | 3.9  | 20.9 | 57.1 | 7.7 |
| 18948.13 | 10.3 | 3.7  | 21.9 | 56.7 | 7.5 |
| 18948.14 | 10.9 | 3.7  | 20.6 | 58.1 | 6.8 |
| 18948.15 | 9.4  | 11.3 | 18.2 | 53.4 | 7.7 |

|                            |      |     |      |      |     |        |
|----------------------------|------|-----|------|------|-----|--------|
| 21084 M3                   | 8.4  | 8.7 | 27.8 | 48.6 | 6.5 | ND     |
| 21084 M4 lines, field 2012 |      |     |      |      |     |        |
| 21084.1                    | 10.0 | 5.9 | 20.7 | 55.6 | 7.9 | MUTANT |
| 21084.3                    | 10.0 | 5.0 | 16.8 | 58.6 | 9.4 | MUTANT |
| 21084.4                    | 10.3 | 5.5 | 16.8 | 58.5 | 8.8 | MUTANT |
| 21084.7                    | 9.6  | 6.9 | 18.8 | 57.0 | 7.6 | MUTANT |
| (by sequencing)            |      |     |      |      |     |        |

|                      |       |      |       |       |      |        |
|----------------------|-------|------|-------|-------|------|--------|
| 18610 M3             | 10.22 | 7.12 | 25.02 | 50.96 | 6.68 | ND     |
| 18610 M4, field 2012 |       |      |       |       |      |        |
| 18610.1              | 9.7   | 5.2  | 20.2  | 56.6  | 8.2  | MUTANT |
| 18610.2              | 9.6   | 6.4  | 21.1  | 54.6  | 8.2  | MUTANT |
| 18610.3              | 9.6   | 6.1  | 21.6  | 55.6  | 7.1  | MUTANT |
| 18610.4              | 9.4   | 7.1  | 21.7  | 53.7  | 8.1  | MUTANT |
| 18610.5              | 9.4   | 5.9  | 20.4  | 56.0  | 8.2  | MUTANT |
| 18610.6              | 9.3   | 5.9  | 19.8  | 57.1  | 8.0  | MUTANT |
| 18610.7              | 9.3   | 6.3  | 20.1  | 55.7  | 8.5  | MUTANT |
| 18610.8              | 9.7   | 6.2  | 20.9  | 55.2  | 8.0  | MUTANT |
| 18610.9              | 9.6   | 5.9  | 21.3  | 55.5  | 7.8  | MUTANT |
| 18610.10             | 9.6   | 5.5  | 20.0  | 56.9  | 8.0  | MUTANT |
| 18610.11             | 9.5   | 6.3  | 20.3  | 56.2  | 7.8  | MUTANT |
| 18610.12             | 9.4   | 5.9  | 21.6  | 55.5  | 7.7  | MUTANT |
| 18610.13             | 9.6   | 6.0  | 21.2  | 55.2  | 8.0  | MUTANT |

|                      |       |       |       |       |      | (by sequencing)     |
|----------------------|-------|-------|-------|-------|------|---------------------|
| 15073 M3             | 8.14  | 15.19 | 18.15 | 50.35 | 8.17 | ND                  |
| 15073 M4, field 2010 |       |       |       |       |      | presumed homozygous |
| 15073.1              | 8.88  | 10.02 | 16.11 | 56.06 | 8.93 |                     |
| 15073.2              | 8.70  | 10.84 | 18.67 | 53.51 | 8.28 |                     |
| 15073.3              | 8.48  | 11.27 | 16.29 | 55.40 | 8.56 |                     |
| 15073.4              | 8.51  | 11.72 | 17.00 | 54.13 | 8.63 |                     |
| 15073.5              | 8.87  | 10.60 | 17.20 | 54.63 | 8.71 |                     |
| 15073.6              | 8.38  | 11.46 | 17.86 | 53.49 | 8.81 |                     |
| 15073.7              | 8.51  | 12.25 | 16.37 | 54.47 | 8.40 |                     |
| 15073.8              | 7.82  | 12.84 | 17.45 | 53.18 | 8.71 |                     |
| 15073.9              | 8.56  | 13.58 | 17.44 | 52.46 | 7.96 |                     |
| 15073.10             | 8.08  | 12.58 | 16.87 | 54.55 | 7.92 |                     |
| 15073.11             | 8.14  | 12.89 | 17.47 | 52.97 | 8.53 |                     |
| 15073.12             | 8.25  | 13.53 | 17.28 | 53.22 | 7.72 |                     |
| 18190 M3             | 8.61  | 15.32 | 17.15 | 50.91 | 8.01 | ND                  |
| 18190 M4, field 2008 |       |       |       |       |      | presumed homozygous |
| 18190.1              | 8.79  | 16.73 | 16.52 | 49.65 | 8.31 |                     |
| 18190.2              | 8.97  | 13.71 | 16.76 | 51.89 | 8.68 |                     |
| 18190.3              | 8.48  | 18.13 | 17.43 | 47.87 | 8.09 |                     |
| 18190.4              | 10.38 | 4.19  | 23.55 | 53.68 | 8.22 |                     |
| 18190.5              | 9.19  | 14.15 | 17.25 | 50.89 | 8.52 |                     |
| 18190.6              | 9.21  | 16.98 | 16.80 | 48.52 | 8.49 |                     |
| 18190.7              | 8.68  | 15.55 | 16.93 | 50.59 | 8.25 |                     |
| 18190.8              | 8.57  | 12.64 | 17.42 | 52.25 | 9.11 |                     |
| 18190.9              | 8.73  | 15.09 | 17.84 | 50.49 | 7.85 |                     |
| 18190.10             | 9.21  | 15.57 | 17.38 | 49.42 | 8.42 |                     |

**ND - not determined**

Genotyping assays, where available, or Sanger di-deoxy sequencing was used where indicated to determine the genotype of M4 individuals.
